# Supplementary material
Source: ML conference proceedings conference paper supplement (https://openaccess.thecvf.com/content/CVPR2022/html/Chen_Computing_Wasserstein-p_Distance_CVPR_2022_paper.html)
Supplement: Supplementary file 1 [file Chen_Computing_Wasserstein-p_Distance_CVPR_2022_supplemental.pdf]

## A. Proof of Theorem 1

Proof. since  $\text{spt}\pi^* \subset \mathcal{N}$ , its easy to verify that  $\pi^* \in \Pi^{\mathcal{N}}(\mu, \nu)$ , so that  $\Pi^{\mathcal{N}}(\mu, \nu)$  is nonempty. and the problem  $\min_{\pi \in \Pi^{\mathcal{N}}(\mu, \nu)} \hat{E}_\varepsilon(\pi)$  is feasible.

Now let  $\hat{\pi}^*(\varepsilon_l)$  be the solution of (7) for  $\varepsilon = \varepsilon_l$ . Since  $\Pi^{\mathcal{N}}(\mu, \nu)$  is bounded, we can extract a sequence (that we do not relabel for the sake of simplicity) such that  $\hat{\pi}^*(\varepsilon_l) \rightarrow \hat{\pi}^*(l \rightarrow +\infty)$ . Since  $\Pi^{\mathcal{N}}(\mu, \nu)$  is closed,  $\hat{\pi}^* \in \Pi^{\mathcal{N}}(\mu, \nu)$ . Since  $\pi^*$  is an optimal solution of unregularized problem, one has

$$\begin{aligned} 0 &\leq \langle c, \hat{\pi}^*(\varepsilon_l) \rangle - \langle c, \pi^* \rangle & (17) \\ &= \sum_{(i,j) \in \mathcal{N}_0} c_{ij} \hat{\pi}_{ij}^*(\varepsilon_l) - \sum_{(i,j) \in \mathcal{N}_0} c_{ij} \pi_{ij}^* \\ &= \sum_{(i,j) \in \mathcal{N}} c_{ij} \hat{\pi}_{ij}^*(\varepsilon_l) - \sum_{(i,j) \in \mathcal{N}} c_{ij} \pi_{ij}^* \end{aligned}$$

Since  $\hat{\pi}^*(\varepsilon_l)$  is the solution of (7), one has

$$\begin{aligned} \sum_{(i,j) \in \mathcal{N}} c_{ij} \hat{\pi}_{ij}^*(\varepsilon_l) - \varepsilon_l \sum_{(i,j) \in \mathcal{N}} \hat{\pi}_{ij}^*(\varepsilon_l) \log \frac{1}{\hat{\pi}_{ij}^*(\varepsilon_l)} &\leq \\ \sum_{(i,j) \in \mathcal{N}} c_{ij} \pi_{ij}^* - \varepsilon_l \sum_{(i,j) \in \mathcal{N}} \pi_{ij}^* \log \frac{1}{\pi_{ij}^*} & (18) \end{aligned}$$

By combining (17) and (18) together we have

$$\begin{aligned} 0 &\leq \langle c, \hat{\pi}^*(\varepsilon_l) \rangle - \langle c, \pi^* \rangle & (19) \\ &\leq \varepsilon_l \left( \sum_{(i,j) \in \mathcal{N}} \hat{\pi}_{ij}^*(\varepsilon_l) \log \frac{1}{\hat{\pi}_{ij}^*(\varepsilon_l)} - \sum_{(i,j) \in \mathcal{N}} \pi_{ij}^* \log \frac{1}{\pi_{ij}^*} \right) \\ &= \varepsilon_l \left( \sum_{(i,j) \in \mathcal{N}_0} \hat{\pi}_{ij}^*(\varepsilon_l) \log \frac{1}{\hat{\pi}_{ij}^*(\varepsilon_l)} - \sum_{(i,j) \in \mathcal{N}_0} \pi_{ij}^* \log \frac{1}{\pi_{ij}^*} \right) \\ &= H(\hat{\pi}^*(\varepsilon_l)) - H(\pi^*) \end{aligned}$$

Since the  $H$  is continues, taking the limit  $l \rightarrow +\infty$  in (19) shows that  $\langle c, \hat{\pi}^* \rangle = \langle c, \pi^* \rangle$ , so that  $\hat{\pi}^*$  is a feasible candidate of the following optimization problem

$$\begin{aligned} \min_{\pi \in \Pi(\mu, \nu)} & -H(\pi) & (20) \\ \text{s.t.} & \langle c, \pi \rangle = L_c(\mu, \nu). \end{aligned}$$

Dividing by  $\varepsilon_l$  in (19) we have

$$0 \leq H(\hat{\pi}^*(\varepsilon_l)) - H(\pi^*) \quad (21)$$

Taking the limits  $l \rightarrow +\infty$  shows that  $H(\pi^*) \leq H(\hat{\pi}^*)$ , which shows that  $\hat{\pi}^*$  is a solution of (20). Since the solution to the problem (20) is unique by strict convexity of  $-H$ , we have  $\hat{\pi}^* = \pi^*$  and the whole sequence is converging. Since

$x \log \frac{1}{x}$  is a continuous and bounded for  $x \in [0, 1]$ , we have

$$\begin{aligned} \lim_{\varepsilon \rightarrow 0} \min_{\pi \in \Pi(\mu, \nu)} \hat{E}_\varepsilon(\pi) &= \lim_{\varepsilon \rightarrow 0} \sum_{(i,j) \in \mathcal{N}} \pi_{ij}^*(\varepsilon) c_{ij} - \\ &= \lim_{\varepsilon \rightarrow 0} \varepsilon \sum_{(i,j) \in \mathcal{N}} \pi_{ij}^*(\varepsilon) \log \frac{1}{\pi_{ij}^*(\varepsilon)} & (22) \\ &= \sum_{(i,j) \in \mathcal{N}} \pi_{ij}^* c_{ij} \\ &= \sum_{(i,j) \in \mathcal{N}_0} \pi_{ij}^* c_{ij} = \langle c, \pi^* \rangle = L_c(\mu, \nu), \end{aligned}$$

which finishes the proof.

### A.1. Proof of Theorem 2

We extend the restricted kernel  $K$  to the whole space  $\mathcal{N}_0$ . Define

$$\tilde{K}_{ij} := \begin{cases} K_{ij} & (i, j) \in \mathcal{N}, \\ 0 & (i, j) \in \mathcal{N}_0 \setminus \mathcal{N}. \end{cases} \quad (23)$$

Since  $\text{spt}\pi^* \subset \mathcal{N}$  and  $\tilde{K}_{ij}$  is strictly positive for all  $(i, j) \in \mathcal{N}$ , it is easy to check that  $r_i(\tilde{K}) > 0$  for all  $i \in [n]$  and  $c_j(\tilde{K}) > 0$  for all  $j \in [m]$ , so that the iteration in Algorithm 1 can be extended to the whole space  $\mathcal{N}_0$  with

$$\begin{aligned} u_i^{(k+1)} &\leftarrow \mu_i / r_i(\tilde{K} v^{(k)}), \text{ for all } i \in [n], \\ v^{(k+1)} &\leftarrow v^{(k)}, k \text{ is even,} \\ v_j^{(k+1)} &\leftarrow \nu_j / c_j(\tilde{K}^T u^{(k+1)}), \text{ for all } j \in [m], \\ u^{(k+1)} &\leftarrow u^{(k)}, k \text{ is odd.} & (24) \end{aligned}$$

According to the theorem of the RAS algorithm (see [23] Theorem 4.1), the iteration (24) is convergent and outputs a coupling  $\pi$  satisfying  $\|r(\pi) - \mu\|_2 + \|c(\pi) - \nu\|_2 < \delta^2$ . It is easy to check that  $\pi_{ij} = 0$  for all  $(i, j) \in \mathcal{N}_0 \setminus \mathcal{N}$ , which shows that  $r(\pi) = r^{\mathcal{N}}(\pi)$  and  $c(\pi) = c^{\mathcal{N}}(\pi)$ . The number of iterations  $K_\delta$  needed to scale  $\tilde{K}$  to accuracy  $\delta$  satisfies  $K_\delta = O(\rho h(\delta)^{-2} \log(h/s))$ , where  $h = \sum_{(i,j) \in \mathcal{N}_0} \pi_{ij} = \sum_{(i,j) \in \mathcal{N}} \pi_{ij}$ ,  $s = \min_{(i,j) \in \mathcal{N}_0 | \pi_{ij} > 0} \pi = \min_{(i,j) \in \mathcal{N}} \pi$  and  $\rho = \max\{\|r(\pi)\|_\infty, \|c(\pi)\|_\infty\} = \max\{\|r^{\mathcal{N}}(\pi)\|_\infty, \|c^{\mathcal{N}}(\pi)\|_\infty\}$

### A.2. Proof of Theorem 3

Let  $\mathcal{N} \subset \mathcal{N}_0$  be a subspace such that  $\text{spt}\pi^* \subset \mathcal{N}$ . Algorithm 1 with stopping criterion  $\|r^{\mathcal{N}}(\pi^{(k)}) - \mu\|_1 + \|c^{\mathcal{N}}(\pi^{(k)}) - \nu\|_1 < \delta$  outputs a matrix  $\pi$  satisfying  $\|r^{\mathcal{N}}(\pi) - \mu\|_1 + \|c^{\mathcal{N}}(\pi) - \nu\|_1 < \delta$  after  $O((\delta)^{-2} \log(h/s))$  iterations.

Proof. (Pinskera's Inequality). For any probability measures  $p$  and  $q$ ,  $\|p - q\|_1 \leq \sqrt{2\text{KL}(p|q)}$ .

Let  $k^*$  be the first iteration such that  $\|r^{\mathcal{N}}(\pi^{(k^*)}) - \mu\|_1 + \|c^{\mathcal{N}}(\pi^{(k^*)}) - \nu\|_1 < \delta$ . Pinskera's inequality implies that for

any  $k < k^*$ , we have

$$\delta^2 < \left( \|r^{\mathcal{N}}(\pi^{(k)}) - \mu\|_1 + \|c^{\mathcal{N}}(\pi^{(k)}) - \nu\|_1 \right)^2 < \left( \sqrt{2\text{KL}(\mu|r^{\mathcal{N}}(\pi^{(k)}))} + \sqrt{2\text{KL}(\nu|c^{\mathcal{N}}(\pi^{(k)}))} \right)^2$$

Assume without loss of generality that  $k$  is even, so that  $c^{\mathcal{N}}(\pi^{(k)}) = \nu$  and  $r^{\mathcal{N}}(\pi^{(k-1)}) = \mu$ , which shows that

$$\begin{aligned} & \left( \sqrt{2\text{KL}(\mu|r^{\mathcal{N}}(\pi^{(k)}))} + \sqrt{2\text{KL}(\nu|c^{\mathcal{N}}(\pi^{(k)}))} \right)^2 \\ &= 2\text{KL}(\mu|r^{\mathcal{N}}(\pi^{(k)})) \\ &= 2 \sum_{i=1}^n \mu_i \log \frac{\mu_i}{r_i^{\mathcal{N}}(\pi^{(k)})} \end{aligned} \quad (25)$$

We have

$$\begin{aligned} \sum_{i=1}^n \mu_i \log \frac{\mu_i}{r_i^{\mathcal{N}}(\pi^{(k)})} &= \sum_{i=1}^n \mu_i \log \frac{\mu_i}{\sum_{\{j|(i,j) \in \mathcal{N}\}} u_i^{(k)} K_{ij} v_j^{(k)}} \\ &= \sum_{i=1}^n \mu_i \log \frac{\mu_i}{u_i^{(k)} \sum_{\{j|(i,j) \in \mathcal{N}\}} K_{ij} v_j^{(k)}} \\ &= \sum_{i=1}^n \mu_i \log \frac{u_i^{(k+1)}}{u_i^{(k)}} \\ &= \sum_{i=1}^n \mu_i \log \frac{u_i^{(k+1)}}{u_i^{(k)}} + \sum_{j=1}^m \nu_j \log \frac{v_j^{(k+1)}}{v_j^{(k)}}. \end{aligned}$$

So that

$$\frac{1}{2} \delta^2 < \sum_{i=1}^n \mu_i \log \frac{u_i^{(k+1)}}{u_i^{(k)}} + \sum_{j=1}^m \nu_j \log \frac{v_j^{(k+1)}}{v_j^{(k)}}. \quad (26)$$

Equation (26) holds for  $k$  is odd. By taking  $k = 1, \dots, k+1$  and adding all the equality together we have

$$\begin{aligned} \frac{1}{2} k \delta^2 &< \sum_{i=1}^n \mu_i \log u_i^{(k+1)} + \sum_{j=1}^m \nu_j \log v_j^{(k+1)} - \\ & \sum_{i=1}^n \mu_i \log u_i^{(1)} - \sum_{j=1}^m \nu_j \log v_j^{(1)}. \end{aligned} \quad (27)$$

Define the Lyapunov function  $\mathbb{R}^n \times \mathbb{R}^m \rightarrow \mathbb{R}$

$$f(x, y) = \sum_{(i,j) \in \mathcal{N}} K_{ij} e^{x_i + y_j} - \sum_{i=1}^n \mu_i x_i - \sum_{j=1}^m \nu_j y_j \quad (28)$$

Let  $f(x^*, y^*)$  the global minimum of  $f$ , we have

$$\sum_{(i,j) \in \mathcal{N}} K_{ij} e^{x_i^* + y_j^*} = 1, \quad (29)$$

$$x_i^* + y_j^* \leq \log\left(\frac{1}{s}\right), \forall i \in [n], \forall j \in [m]. \quad (30)$$

So that

$$\begin{aligned} \frac{1}{2} k \delta^2 &< \sum_{i=1}^n \mu_i \log u_i^{(k+1)} + \sum_{j=1}^m \nu_j \log v_j^{(k+1)} \\ &= \sum_{i=1}^n \mu_i \log u_i^{(1)} + \sum_{j=1}^m \nu_j \log v_j^{(1)} \\ &= f(u^{(1)}, v^{(1)}) - f(u^{(k+1)}, v^{(k+1)}) \\ &\leq f(u^{(1)}, v^{(1)}) - f(x^*, y^*) \\ &= \left(1 - \sum_{i=1}^n \mu_i \log u_i^{(1)}\right) - \left(1 - \sum_{i=1}^n \mu_i x_i^* - \sum_{j=1}^m \nu_j y_j^*\right) \\ &\leq - \sum_{i=1}^n \mu_i \log \frac{\mu_i}{\sum_{j=1}^m K_{ij}} + \log \frac{1}{s} \\ &= \sum_{i=1}^n \mu_i \log \frac{\sum_{j=1}^m K_{ij}}{\mu_i} + \log \frac{1}{s} \\ & \quad \left( \text{since } \sum_{i=1}^n \mu_i x_i^* + \sum_{j=1}^m \nu_j y_j^* \leq \log \frac{1}{s} \right) \\ &\leq \log \sum_{i=1}^n \left( \frac{\sum_{j=1}^m K_{ij}}{\mu_i} \right) + \log \left( \frac{1}{s} \right) \\ & \quad \text{(Jensen inequality)} \\ &= \log \frac{h}{s}. \end{aligned} \quad (31)$$

So that the inequality (32) implies that we terminate in  $k^* \leq 2\delta^{-2} \log(h/s)$  steps, which finishes the proof.

To prove Theorem (4), we state the following lemmas.

**Lemma 1** For  $\pi \in \Pi(\mu, \nu)$ , we have  $0 \leq H(\pi) \leq n \log n$ .

**Lemma 2** If  $\pi_1, \pi_2 \in \mathbb{R}_+^{n \times m}$  are nonnegative matrices and  $\lambda \in [0, 1]$ , we have

$$H(\lambda \pi_1 + (1 - \lambda) \pi_2) \leq \lambda H(\pi_1) + (1 - \lambda) H(\pi_2) + \max\{\|\pi_1\|_1, \|\pi_2\|_1\} \cdot h(\lambda)$$

where  $h(\lambda) = \lambda \log \frac{1}{\lambda} + (1 - \lambda) \log \frac{1}{1 - \lambda} \quad \forall \lambda \in [0, 1]$ .

**Lemma 3**  $h(\lambda) \leq \lambda(\log \frac{1}{\lambda} + 1), \quad \lambda \in [0, 1]$

**Lemma 4** Let  $\pi^*$  be the optimal solution of the unregularized problem,  $\hat{\pi}^*(\hat{\varepsilon})$  be the optimal solution of the restricted optimal transport (7). The gap between the  $\pi^*$  and  $\hat{\pi}^*(\hat{\varepsilon})$  can be bounded by

$$\|\hat{\pi}^*(\hat{\varepsilon}) - \pi^*\|_1 \leq 2 \exp(-\Delta/\hat{\varepsilon} + 4 \frac{\log(n)}{n^2})$$

**Proof.** Let  $V$  be the vertices of  $\Pi(\mu, \nu)$  and  $O : \{\pi \in V | \langle \pi, c \rangle = \langle \pi^*, c \rangle\}$  be the set of optimal vertex solution of (3). Let the suboptimal set be defined as  $O_s := \{\pi \in$

$V|\langle \pi, c \rangle > \langle \pi^*, c \rangle$ . Since  $\hat{\pi}^*(\hat{\varepsilon}) \in \Pi(\mu, \nu)$ , there exist  $\lambda \in (0, 1)$ ,  $\pi^* \in V$  and  $\tilde{\pi} \in \text{span}(O_s)$  such that

$$\hat{\pi}^*(\hat{\varepsilon}) = (1 - \gamma)\pi^* + \gamma\tilde{\pi}.$$

We define the gap between  $\hat{\pi}^*(\hat{\varepsilon})$  and  $\pi^*$  by

$$g(\varepsilon) := \langle \hat{\pi}^*(\hat{\varepsilon}), c \rangle - \langle \pi^*, c \rangle$$

The lower bound of  $g(\varepsilon)$  could be estimated by

$$\begin{aligned} g(\varepsilon) &= \langle \hat{\pi}^*(\hat{\varepsilon}), c \rangle - \langle \pi^*, c \rangle \\ &= \langle \hat{\pi}^*(\hat{\varepsilon}) - \pi^*, c \rangle \\ &= \gamma \langle \pi^* - \tilde{\pi}, c \rangle \geq \gamma \Delta \end{aligned}$$

The upper bound of  $g(\varepsilon)$  could be estimated by

$$\begin{aligned} g(\varepsilon) &= \langle \hat{\pi}^*(\hat{\varepsilon}), c \rangle - \langle \pi^*, c \rangle \\ &\leq \varepsilon H(\hat{\pi}^*(\hat{\varepsilon})) - \varepsilon H(\pi^*). \end{aligned} \quad (32)$$

According to Lemma 2, we have

$$\begin{aligned} H(\hat{\pi}^*(\hat{\varepsilon})) &= H((1 - \gamma)\pi^* + \gamma\tilde{\pi}) \\ &\leq (1 - \gamma)H(\pi^*) + \gamma H(\tilde{\pi}) \\ &\quad + \max\{\|\pi^*\|_1, \|\tilde{\pi}\|_1\}h(\lambda). \end{aligned}$$

One can check that  $\|\pi^*\|_1 = 1$ , so that we have

$$H(\hat{\pi}^*(\hat{\varepsilon})) \leq (1 - \gamma)H(\pi^*) + \gamma H(\tilde{\pi}) + h(\lambda). \quad (33)$$

Combining (32) and (33), the upper bound of  $g(\varepsilon)/\varepsilon$  could be estimated by

$$\begin{aligned} \frac{g(\varepsilon)}{\varepsilon} &\leq H(\hat{\pi}^*(\hat{\varepsilon})) - H(\pi^*) \\ &\leq \gamma |H(\tilde{\pi}) - H(\pi^*)| + h(\gamma). \end{aligned}$$

According to lemma 1 and  $\gamma \leq \frac{g(\varepsilon)}{\Delta}$ , we have

$$\frac{g(\varepsilon)}{\varepsilon} \leq \frac{g(\varepsilon)}{\Delta} |H(\tilde{\pi}) - H(\pi^*)| + h\left(\frac{g(\varepsilon)}{\Delta}\right).$$

According to lemma 1 and lemma 3, we have

$$\frac{g(\varepsilon)}{\varepsilon} \leq \frac{g(\varepsilon)}{\Delta} n \log n + \frac{g(\varepsilon)}{\Delta} \log \frac{\Delta}{g(\varepsilon)} + \frac{g(\varepsilon)}{\Delta},$$

which shows that  $\Delta \exp(-\Delta/\varepsilon + n \log n) \geq g(\varepsilon) \geq \Delta \gamma$  and

$$\begin{aligned} \|\hat{\pi}^*(\hat{\varepsilon}) - \pi^*\|_1 &\leq \gamma \|\pi^* - \tilde{\pi}\|_1 \\ &\leq \gamma \|\pi^*\|_1 + \|\tilde{\pi}\|_1 \\ &\leq 2\Delta \exp(-\Delta/\varepsilon + n \log n) \end{aligned}$$

### A.3. Proof of Theorem 4

Proof. First, we prove that  $\Delta > 0$ , that is, we show  $\inf_{\{\pi \in V: \langle c, \pi \rangle > \langle c, \pi^* \rangle\}} \langle c, \pi \rangle - \langle c, \pi^* \rangle > 0$ . Since the set  $V$  is the vertices of the set  $\Pi(\mu, \nu)$ , so that the set  $V$  contains

finite elements, which shows that the set  $\{\pi \in V : \langle c, \pi \rangle > \langle c, \pi^* \rangle\}$  has finite elements and we have  $\Delta > 0$ .

Second, let  $s = \min_{\{(i,j) \in \mathcal{N}, \pi_{ij} > 0\}} \pi_{ij}$ , we show that for any  $\varepsilon \leq \varepsilon_0 < \frac{\Delta}{n \log n - \log(s/2)}$ , the following inequality holds:

$$\|\hat{\pi}(\varepsilon)^{(l+1)} - \pi^*\|_1 < \frac{s}{2} + \delta, \quad (34)$$

where  $\hat{\pi}(\varepsilon)^{(l+1)}$  is the coupling generated by the RestrictedSinkhorn (Algorithm 2, step 5). If the claim (34) does not hold, then there exists some  $\hat{\varepsilon} < \frac{\Delta}{n \log n - \log(s/2)}$  such that

$$\|\hat{\pi}(\hat{\varepsilon})^{(l+1)} - \pi^*\|_1 \geq \frac{s}{2} + \delta, \quad (35)$$

Let  $\hat{\pi}^*(\hat{\varepsilon})$  be the optimal solution of the restricted optimal transport (7), we have

$$\begin{aligned} \|\hat{\pi}(\hat{\varepsilon})^{(l+1)} - \pi^*\|_1 &= \|\hat{\pi}(\hat{\varepsilon})^{(l+1)} - \hat{\pi}^*(\hat{\varepsilon}) + \hat{\pi}^*(\hat{\varepsilon}) - \pi^*\|_1 \\ &\leq \|\hat{\pi}(\hat{\varepsilon})^{(l+1)} - \hat{\pi}^*(\hat{\varepsilon})\|_1 \\ &\quad + \|\hat{\pi}^*(\hat{\varepsilon}) - \pi^*\|_1 \\ &\leq \delta + \|\hat{\pi}^*(\hat{\varepsilon}) - \pi^*\|_1 \end{aligned} \quad (36)$$

According to Lemma 4, we have

$$\|\hat{\pi}^*(\hat{\varepsilon}) - \pi^*\|_1 \leq 2 \exp(-\Delta/\hat{\varepsilon} + n \log n)$$

So that we have

$$\begin{aligned} \|\hat{\pi}^*(\hat{\varepsilon}) - \pi^*\|_1 &\leq \exp\left(-\frac{\Delta}{\hat{\varepsilon}} + n \log n\right) \\ &< \exp\left(-\frac{\Delta}{\frac{\Delta}{n \log n - \log(s/2)}} + n \log n\right) \\ &= \exp(\log(s/2)) \\ &= s/2 \end{aligned} \quad (37)$$

By combining (36) and (37), we have

$$\|\hat{\pi}(\hat{\varepsilon})^{(l+1)} - \pi^*\|_1 < \delta + \frac{s}{2}, \quad (38)$$

which contradicts the result of (35). So the claim (35) is incorrect and claim (34) holds.

So that for any  $(i, j) \in \text{spt}\pi$ , we have

$$\begin{aligned} \hat{\pi}_{ij}(\varepsilon)^{(l+1)} &\geq \pi_{ij}^* - \frac{s}{2} - \delta \\ &\geq s - \frac{s}{2} - \delta \\ &\geq \frac{s}{2} - \delta. \end{aligned}$$

Finally, let  $\theta < (\frac{s}{2} - \delta)^{(1+c)}$ , we have

$$\begin{aligned} K_{ij}^{\mathcal{N}^{(l)}}(\varepsilon^{(l+1)}, \alpha^{(l+1)}, \beta^{(l+1)}) &= \exp(\log(\hat{\pi}_{ij}^{(l+1)})(1+c)) \\ &\geq \exp(\log(\frac{s}{2} - \delta)(1+c)) \\ &= (\frac{s}{2} - \delta)^{(1+c)} > \theta, \end{aligned}$$

which shows that  $K_{ij}^{\mathcal{N}^{(l)}}(\varepsilon^{(l+1)}, \alpha^{(l+1)}, \beta^{(l+1)}) > \theta$  for any  $(i, j) \in \text{spt}\pi$ .
